# Supplementary material
Source: publisher site journal article supplement (https://www.spandidos-publications.com/5898/downloadSupplementary)

Figure S1. An example of normal skin above the melanoma. The normal skin exhibits negative staining for the P53 antibody.

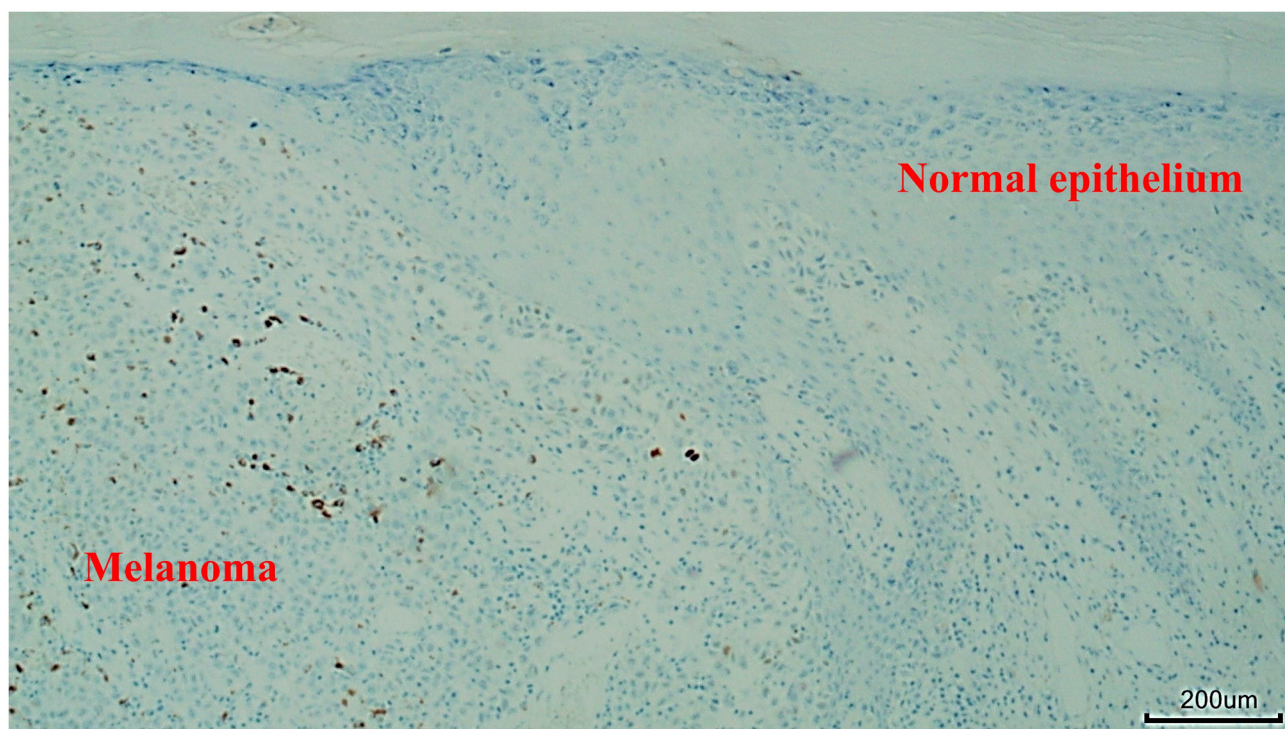

Supplement: Supplementary file 1 [file downloadSupplementary]
